# Supplementary material for: Molecular driver alterations and their clinical relevance in cancer of unknown primary site
Source: PubMed Central journal article supplement (PMC5190099; doi:10.18632/oncotarget.10035), 2016-06-14
Supplement: oncotarget-07-44322-s001.pdf [file oncotarget-07-44322-s001.pdf]

## Molecular driver alterations and their clinical relevance in cancer of unknown primary site

### Supplementary Materials

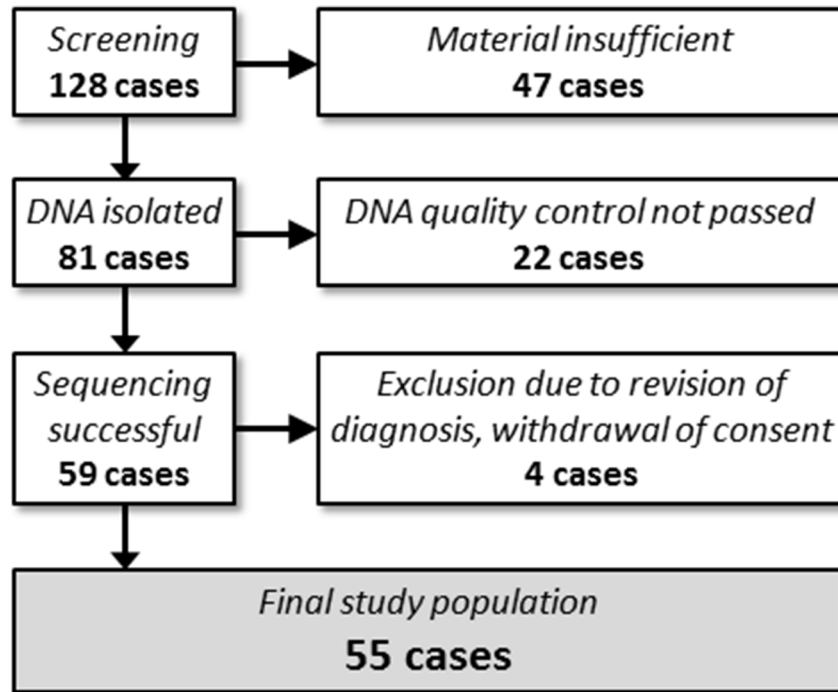

Supplementary Figure S1: Diagram showing the case selection strategy for massive parallel multigene sequencing.

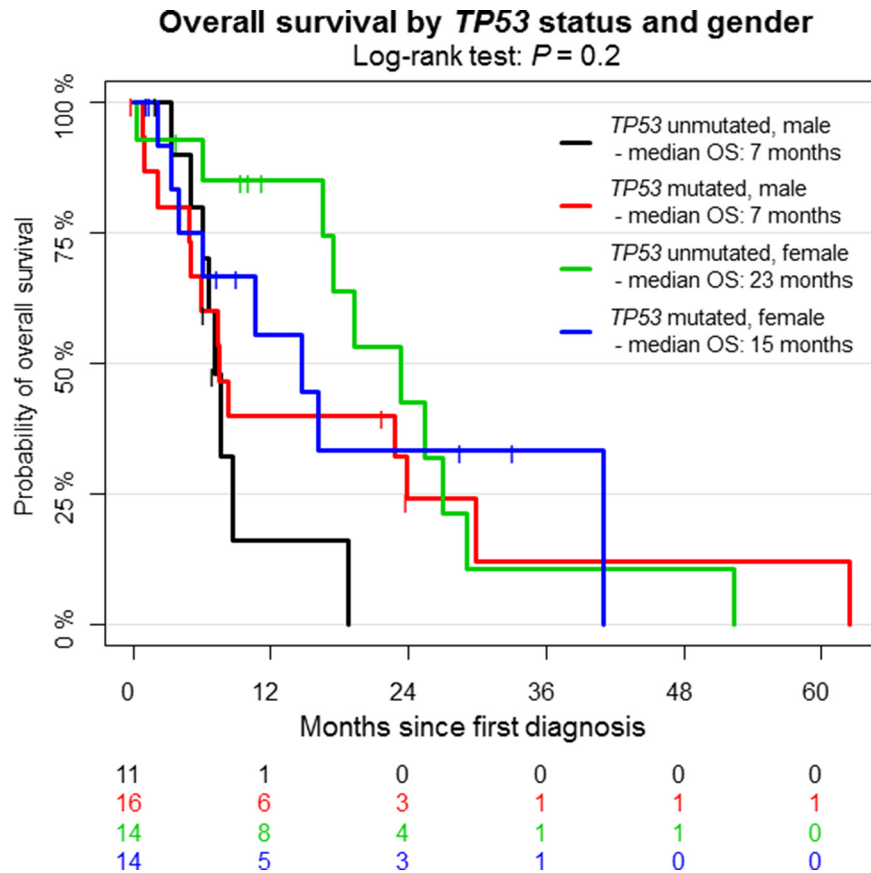

Supplementary Figure S2: Overall survival (OS) of 55 CUP cases depending on *TP53* mutational status and gender.

Supplementary Table S1: Panel of genes subjected to sequencing and coverage analysis

|               |              |              |               |                |
|---------------|--------------|--------------|---------------|----------------|
| <i>ABL1</i>   | <i>EGFR</i>  | <i>GNAQ</i>  | <i>KRAS</i>   | <i>PTPN11</i>  |
| <i>AKT1</i>   | <i>ERBB2</i> | <i>GNAS</i>  | <i>MET</i>    | <i>RB1</i>     |
| <i>ALK</i>    | <i>ERBB4</i> | <i>HNF1A</i> | <i>MLH1</i>   | <i>RET</i>     |
| <i>APC</i>    | <i>EZH2</i>  | <i>HRAS</i>  | <i>MPL</i>    | <i>SMAD4</i>   |
| <i>ATM</i>    | <i>FBXW7</i> | <i>IDH1</i>  | <i>NOTCH1</i> | <i>SMARCB1</i> |
| <i>BRAF</i>   | <i>FGFR1</i> | <i>IDH2</i>  | <i>NPM1</i>   | <i>SMO</i>     |
| <i>CDH1</i>   | <i>FGFR2</i> | <i>JAK2</i>  | <i>NRAS</i>   | <i>SRC</i>     |
| <i>CDKN2A</i> | <i>FGFR3</i> | <i>JAK3</i>  | <i>PDGFRA</i> | <i>STK11</i>   |
| <i>CSF1R</i>  | <i>FLT3</i>  | <i>KDR</i>   | <i>PIK3CA</i> | <i>TP53</i>    |
| <i>CTNNB1</i> | <i>GNA11</i> | <i>KIT</i>   | <i>PTEN</i>   | <i>VHL</i>     |

Supplementary Table S2: Mutations and CNVs. See Supplementary\_Table\_S2
